# Supplementary material for: Immobilized Pd complexes over HMMS as catalysts for Heck cross-coupling and selective hydrogenation reactions
Source: Royal Society of Chemistry journal article supplement (doi:10.1039/c3nj01108a), 2013-11-05
Supplement: c3nj01108a.pdf [file c3nj01108a.pdf]

# **Immobilized Pd complexes over HMMS as catalysts for Heck cross-coupling and selective hydrogenation reactions**

Peng Wang, Hengzhi Liu, Mengmeng Liu, Rong Li\* and Jiantai Ma\*

*College of Chemistry and Chemical Engineering, Lanzhou University, Lanzhou 730000, P. R. China, Fax: +86*

*931 8912311, Tel.: +86 931 8912311, E-mail: majiantai@lzu.edu.cn*

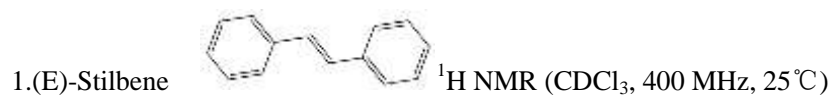

$\delta$  7.60 (d,  $J=1.0$  Hz, 4H),  $\delta$  7.43 (t,  $J=7.5$  Hz, 4H),  $\delta$  7.32 (t,  $J=7.2$  Hz, 2H),  $\delta$  7.19 (s, 2H).

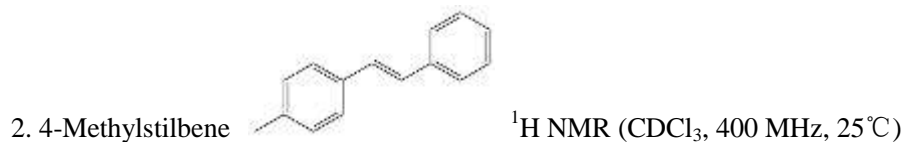

$\delta$  7.48 (d,  $J=7.6$  Hz, 2H),  $\delta$  7.40 (d,  $J=8.0$  Hz, 2H),  $\delta$  7.33 (t,  $J=8.0$  Hz, 2H),  $\delta$  7.23 (t,  $J=7.2$  Hz, 1H),  $\delta$  7.15 (d,  $J=8.0$  Hz, 2H),  $\delta$  7.06 (d,  $J=2.4$  Hz, 1H),  $\delta$  2.34 (s, 3H).

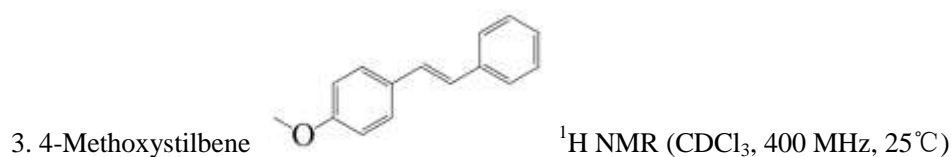

$\delta$  7.36 (d,  $J=7.4$  Hz, 2H),  $\delta$  7.33 (d,  $J=8.7$  Hz, 2H),  $\delta$  7.24 (m, 1H),  $\delta$  6.94 (d,  $J=16.3$  Hz, 1H),  $\delta$  6.84 (d,  $J=16.3$  Hz, 1H),  $\delta$  6.76 (d,  $J=8.7$  Hz, 2H),  $\delta$  3.71 (s, 3H).

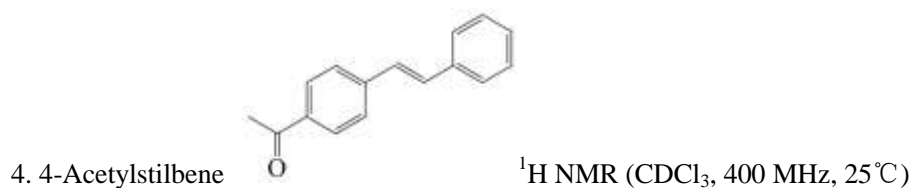

$\delta$  7.90 (d,  $J=8.4$  Hz, 2H),  $\delta$  7.53 (d,  $J=8.4$  Hz, 2H),  $\delta$  7.48 (m, 2H),  $\delta$  7.35 (m, 2H),  $\delta$  7.28 (m, 1H),  $\delta$  7.17 (d,  $J=16.3$  Hz, 1H),  $\delta$  7.07 (d,  $J=16.3$  Hz, 1H),  $\delta$  2.55 (s, 3H)

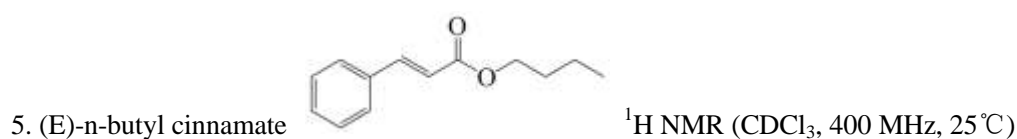

$\delta$  7.72 (d,  $J=16.0$  Hz, 1H),  $\delta$  7.56 (q,  $J=3.7$  Hz, 2H),  $\delta$  7.41 (t,  $J=1.0$  Hz, 3H),  $\delta$  6.48 (d,  $J=16.0$  Hz, 1H),  $\delta$  4.26 (t,  $J=6.7$  Hz, 2H),  $\delta$  1.74 (m, 2H),  $\delta$  1.49 (m, 2H),  $\delta$  1.01 (t,  $J=7.4$  Hz, 3H)

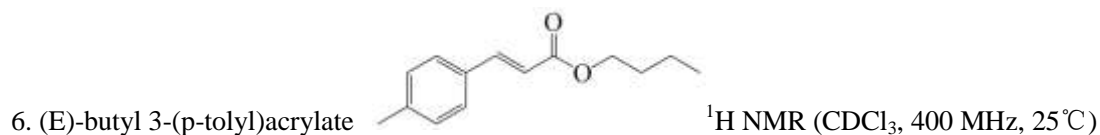

$\delta$  0.88 (t,  $J = 7.5$  Hz, 3H),  $\delta$  1.20 (m,  $J = 7.3$  Hz, 2H),  $\delta$  1.99 (m,  $J = 6$  Hz, 2H),  $\delta$  2.80 (s, 3H),  $\delta$  4.90 (t,  $J = 6.5$  Hz, 2H),  $\delta$  6.60 (d,  $J = 16$  Hz, 1H),  $\delta$  7.25 (d,  $J = 8.5$  Hz, 2H),  $\delta$  7.55 (d,  $J = 8.5$  Hz, 2H),  $\delta$  7.87 (d,  $J = 16$  Hz, 1H).

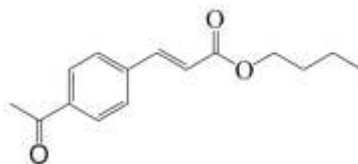

7. (E)-butyl 3-(4-acetylphenyl)acrylate  $^1\text{H NMR}$  ( $\text{CDCl}_3$ , 400 MHz, 25°C)

$\delta$  7.96 (m, 2H),  $\delta$  7.69 (d,  $J=16.0$  Hz, 1H),  $\delta$  7.59 (m, 2H),  $\delta$  6.53 (d,  $J=16.0$  Hz, 1H),  $\delta$  4.22 (t,  $J=6.6$  Hz, 2H),  $\delta$  2.57 (s, 3H),  $\delta$  1.69 (m, 2H),  $\delta$  1.46 (m, 2H),  $\delta$  0.96 (t,  $J=7.4$  Hz, 3H.)

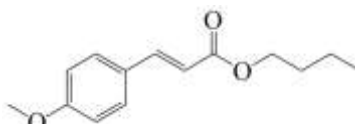

8. (E)-butyl 3-(4-methoxyphenyl)acrylate  $^1\text{H NMR}$  ( $\text{CDCl}_3$ , 400 MHz, 25°C)

$\delta$  7.68 (d,  $J=16.0$  Hz, 1H),  $\delta$  7.51 (m, 2H),  $\delta$  6.93 (m, 2H),  $\delta$  6.35 (d,  $J=16.0$  Hz, 1H),  $\delta$  4.24 (t,  $J=6.6$  Hz, 2H),  $\delta$  3.86 (s, 3H),  $\delta$  1.72 (m, 2H),  $\delta$  1.46 (m, 2H),  $\delta$  0.99 (t,  $J=7.3$  Hz, 3H).

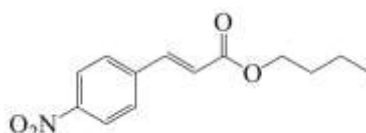

9. (E)-butyl 3-(4-nitrophenyl)acrylate  $^1\text{H NMR}$  ( $\text{CDCl}_3$ , 400 MHz, 25°C)

$\delta$  0.93 (t,  $J = 7.5$ Hz, 3H),  $\delta$  1.40 (m, 2H), 1.66 (m, 2H), 4.17 (t,  $J = 7.5$  Hz, 2H), 6.53 (d,  $J = 16.0$  Hz, 1H), 7.68 (m, 3H),  $\delta$  8.20 (d, 2H,  $J = 8.7$  Hz)

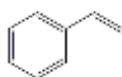

10. Styrene  $^1\text{H NMR}$  ( $\text{CDCl}_3$ , 400 MHz, 25°C)

$\delta$  7.393 (d,  $J = 8$  Hz, 2H),  $\delta$  7.32-7.23 (m, 2H),  $\delta$  7.22 (t,  $J=6.4$  Hz 1H),  $\delta$  6.67-6.74 (m, 1H),  $\delta$  5.71-5.76 (m, 1H),  $\delta$  5.18 (d,  $J=10.8$  Hz, 1H).

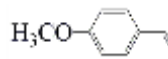

11. 4-Methyl styrene  $^1\text{H NMR}$  ( $\text{CDCl}_3$ , 400 MHz, 25°C)

$\delta$  7.41 (d,  $J=8.8$  Hz, 2H),  $\delta$  6.92 (d,  $J=8.8$  Hz, 2H),  $\delta$  6.70-6.77 (m, 1H),  $\delta$  5.68 (d,  $J=4.8$  Hz, 1H),  $\delta$  5.19 (d,  $J=5.6$  Hz, 1H),  $\delta$  3.16 (s, 3H).

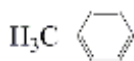

12. 4-methoxy styrene  $^1\text{H NMR}$  ( $\text{CDCl}_3$ , 400 MHz, 25°C)

$\delta$  7.29 (d,  $J=4$  Hz, 2H),  $\delta$  7.11 (d,  $J= 4.0$  Hz, 2H),  $\delta$  6.64-6.71 (m, 1H), 5.68 (d,  $J=17.6$  Hz, 1H),  $\delta$  5.17 (d,  $J= 10.8$  Hz, 1H),  $\delta$  2.32 (s, 3H).
